# Supplementary material for: Molecular and cellular immune features of aged patients with severe COVID-19 pneumonia
Source: Springer Nature journal article supplement (doi:10.1038/s42003-022-03537-z), 2022-06-16
Supplement: MOESM4 [file 42003_2022_3537_MOESM4_ESM.xlsx]

## Sheet: Clinical_Data
Supplementary Table 1. The table contain the list of all patients analyzed (for both CUN and COV groups) accompanied by all clinical data availables.
NA: NOT APPLICABLE
na: NOT AVAILABLE
					Analysis performed
sample_ID	Age	Gender	group_ID	CyTOF	Bulk-RNA	Plasmatic cytokines	Flow cytometry	SEVERITY	TYPE OF Discharged	DAYS FROM ADMISISON TO START NIV OR INTUBATION	pH	pCO2 (mmHg)	pO2 (mmHg)	sO2 (%)	pO2/FiO2	ALT	TOTAL BILIRUBIN	CK	CREATININE	D-DIMER	Hb	WBC (N/uL)	Neutrophils (%)	Neutrophil (N/uL)	Lymphocytes (%)	Lymphocytes (N/uL)	RBC	INR	LDH	CRP	Platelets	FEVER T>37	RESP RATE	SYSTOLIC BLOOD PRESSURE	HEART RATE	COUGH	FATIGUE/MYALGIE	SOFA SCORE	COPD	DIABETES MELLITUS	CARDIOVASCULAR DISEASES	CHRONIC KIDNEY DISAESE	CANCER	OTHER DISEASES
C_004	37	M	CUN	X		X		Severe	Discharged	NA	7.49	31.5	65.2	94	171	81	0.42	328	1.06	na	16	5730	67	3843	19.7	1130	4.32	1.04	401	na	131	YES	30	120	70	NO	YES	na	NO	NO	NO	NO	NO	Mild Hypertension
C_007	37	F	CUN			X		Severe	Deceased	2	7.45	39.9	63.5	92.6	110	57	0.59	355	0.53	640	12.5	7200	93	6696	5	360	4.74	1.23	1022	19	209	YES	26	136	83	YES	NO	5	NO	NO	NO	NO	NO	na
C_009	59	M	CUN			X		Severe	Discharged	NA	7.49	34.9	54.7	90.6	136	190*	0.82	166	0.98	2010	12.3	5600	80.7	4519	10	434	4.79	1.14	526	5	302	YES	24	135	77	YES	NO	2	NO	NO	NO	NO	NO	Depression; Mild Hypertension; Dyslipidemia
C_012	53	M	CUN			X		Severe	Discharged	NA	7.42	46.2	64.8	92.6	309	29	1.02	824*	0.63	3410	11.9	9900	83	8217	11	1089	4.48	1.18	1170	6	199	NO	18	120	94	YES	NO	2	NO	YES	YES	YES	NO	na
C_015	52	M	CUN			X		Severe	Discharged	NA	7.49	35.5	62.3	93.4	155	44	0.72	457	0.9	1050	12	4510	75	3382.5	20	902	4.07	0.96	503	15	296	YES	18	130	80	YES	YES	1	NO	NO	NO	NO	NO	NO
C_017	58	F	CUN			X		Severe	Discharged	2	7.44	36.4	76	96	238	75	0.63	35	0.76	650	11	4350	62	2697	32	1392	3.52	1.08	814	19	238	YES	20	130	78	YES	YES	2	NO	NO	YES	NO	NO	Atrial fibrillation in therapy with flecainide 150 mg and bisoprolol 1.25 mg die
C_021	49	M	CUN	X		X		Severe	Discharged	NA	7.47	40.3	102	97.7	102	28	0.57	38	1.11	820	13.9	8900	78.7	7004.3	11.37	1011.93	4.8	1.07	603	22	268	YES	18	118	72	YES	YES	2	YES	YES	NO	NO	NO	Hypertension; Chronic Lymphotinc Leukemia
C_036	56	F	CUN	X		X		Severe	Discharged	NA	7.49	41	44.5	82.4	211	12	0.51	22	0.54	990	12.4	6040	73	4409.2	23	1389.2	3.29	1.91	628	15	317	YES	22	150	89	NO	NO	2	NO	NO	YES	YES	NO	Hypertension
C_038	48	M	CUN			X		Severe	Discharged	NA	7.46	42.9	77.4	96	97	71	0.67	89	0.79	1580	13.2	8960	88.7	7947.52	10	896	4.65	1.12	1141	6	386	YES	35	130	112	YES	YES	2	NO	NO	NO	NO	NO	NO
C_043	50	F	CUN			X		Severe	Discharged	0	7.4	34.2	80.2	96.9	178	16	0.38	na	0.63	1810	12.9	6750	90.2	6090	7.5	510	3.98	1.06	702	24.5	256	YES	na	130	92	na	na	3	NO	NO	NO	NO	NO	na
C_044	47	M	CUN			X		Severe	Discharged	1	na	na	na	na	295	84	1.11	809*	0.67	2120	11.4	18420*	90.6	na	4.5	830	na	na	820	5	386	NO	na	140	74	na	na	na	na	na	na	na	na	na
C_051	41	M	CUN			X	X	Severe	Discharged	5	7.45	32.7	57.5	91	274	37	0.6	82	0.88	1370	14.4	7380	na	na	na	na	4.5	1.14	748	24	218	YES	20	105	80	YES	YES	2	NO	NO	NO	NO	NO	Arterial hypertension in treatment combination with beta blocker, sartan and thiazide
C_053	45	M	CUN			X	X	Severe	Discharged	NA	7.45	40.7	61.8	92.5	172	36	0.66	76	0.8	na	12.5	6960	78.1	5435.76	na	na	4.86	1.1	1093	17	380	YES	22	128	68	YES	YES	2	NO	NO	NO	NO	NO	NO
C_054	59	M	CUN			X		Severe	Discharged	3	na	na	na	na	68	45	0.36	55	0.59	570	12.1	4390	63	2765.7	25.7	1130	na	na	485	2	708	NO	21	140	65	na	na	na	NO	YES	YES	NO	NO	na
C_060	54	F	CUN			X		Severe	Discharged	NA	7.44	49.2	58.3	91.9	58	27	0.35	44	0.34	600	12.2	5340	70.1	3743.34	na	na	4.31	0.97	529	12	213	YES	24	122	na	YES	YES	2	NO	YES	NO	NO	NO	Hypertension, Obesity, Dyslipidemia
C_061	55	M	CUN			X		Severe	Discharged	5	7.41	36.2	191	99.3	60	29	0.59	116	1.09	960	12.3	3130	na	na	na	na	na	na	547	16	130	YES	36	110	70	na	na	na	NO	NO	NO	NO	NO	na
C_065	53	M	CUN			X	X	Severe	Discharged	5	7.45	45.7	64.5	94	64	32	0.69	50	0.8	1540	12.8	5370	74.5	4000.65	na	na	4.29	1.09	673	8	269	NO	18	140	84	na	na	2	YES	YES	NO	NO	NO	Asthma
C_066	57	M	CUN			X		Severe	Discharged	6	7.45	33.6	69.1	94.4	230	na	na	na	na	na	15.2	5690	73.7	4193.53	20.76	1181.24	5.08	na	851	6	157	YES	28	110	93	na	na	2	NO	NO	NO	NO	NO	na
C_071	39	M	CUN			X	X	Severe	Discharged	0	7.44	38.6	58.2	91.6	97	21	na	397	1.25	460	12.9	5650	72.8	4113	21.5044	1215	5	na	595	14	182	YES	36	120	93	na	na	5	na	na	na	na	na	Hypertension
C_087	52	F	CUN			X	X	Severe	Discharged	NA	7.48	38.8	114	98	114	15	0.53	48	0.49	1230	9.4	9250	77.4	7160	19.6973	1822	3.27	1	703	22	291	YES	22	140	90	na	na	2	NO	NO	YES	NO	NO	Hypertension
C_110	58	F	CUN			X		Severe	Discharged	2	7.49	42.5	60.6	93.5	61	35	0.64	181	0.75	1090	11.5	7510	78.1	5865	18.8815	1418	3.86	1.12	626	21	233	YES	24	128	91	YES	na	4	NO	NO	NO	NO	NO	Hypertension, Appendectomy, Overweight
C_115	57	M	CUN	X				Severe	Discharged	2	7.52	33.7	73.6	96.7	182	28	0.55	224	0.93	1010	13.9	5180	85	4403	9.8	500	4.59	1	521	5	220	YES	20	128	76	na	na	2	NO	NO	NO	NO	NO	nephrolithiasis
C_121	34	M	CUN			X	X	Severe	Discharged	2	7.44	40.9	67.7	94	85	29	na	55	0.92	na	13.9	11180	86.4	9659.52	8.3	927.94	4.99	na	692	26	348	YES	30	130	80	na	na	na	NO	NO	NO	NO	NO	na
C_134	39	F	CUN	X				Severe	Discharged	0	7.44	30.9	70.8	93.4	140	47	0.44	na	0.59	2300	13.5	4800	74.1	3557	19.7	950	4.69	1.09	571	3	712	NO	38	135	99	na	na	3	na	na	na	na	na	na
C_163	57	M	CUN	X		X		Severe	Discharged	0	7.52	29	58.6	90.9	65	165*	0.69	28	1.04	960	9.7	2400	75.9	1822	19.5	460	3.05	1.54	745	24	105	NO	27	126	62	na	na	na	NO	NO	YES	NO	NO	Hypertension; Dyslipidemia
C_176	57	F	CUN			X		Severe	Discharged	NA	7.51	35.7	54.3	91.2	140	56	0.34	131	0.64	430	13	5270	76.5	4030	17.6	930	4.08	0.99	698	6	208	NO	14	110	72	na	na	na	NO	NO	NO	NO	NO	Psoriasis
C_185	49	F	CUN	X		X		Severe	Discharged	NA	7.43	35.4	70.7	95.7	337	127*	0.44	41	0.8	1170	9.2	3540	78.9	2593	21.1017	747	na	na	473	2	104	YES	16	115	87	na	na	3	NO	NO	NO	NO	YES	na
C_195	52	M	CUN			X		Severe	Discharged	7	7.37	36	50	82	56	18	na	180	13,42*	1900	9.9	11230	80.9	9085	9.70614	1090	na	na	712	22	215	NO	20	135	73	na	na	na	na	na	na	na	na	na
C_249	49	M	CUN					Severe	Discharged	NA	7.43	37.6	95.7	96.5	na	31	0.45	64	0.85	710	15.2	3630	58.9	2138.07	33.5	1216.05	5.12	0.95	349	3	112	YES	20	108	90	na	na	na	na	na	na	na	na	na
C_270	39	F	CUN		X			Severe	Discharged	NA	7.45	34.5	85.5	96.6	244	40	0.47	69	0.53	1530	10.5	3230	41.3	1334	49	1583	3.68	0.91	541	2	259	YES	26	125	100	na	na	2	NO	NO	NO	NO	NO	na
C_326	53	M	CUN					Severe	Discharged	3	7.44	42	89	98	99	26	0.47	34	0.64	650	13.6	10460	94.8	9916	4.4	420	na	na	431	5	127	na	na	na	na	na	na	na	na	na	na	na	na	na
C_433	55	M	CUN		X			Severe	Discharged	5	7.55	34	54	92	137	71	0.81	114	0.91	na	14.1	20680	85.3		8.4	1737.12	4.62	0.92	651	1	197	YES	18	120	80	na	na	2	NO	NO	YES	NO	NO	Hypertension
C_449	45	M	CUN		X			Severe	Discharged	6	7.45	36	66.9	95.3	111	21	0.48	26	0.75	650	11.9	7930	76	6030	19.1	1520	3.92	0.97	653	12	262	na	14	120	73	na	na	2	NO	YES	NO	NO	NO	Obesity; Dyslipidemia
Mean	49.8485	22							1		7.45839	37.629	72.9806	93.571	149.875	39.3448	0.586207	125.179	0.780323	1221.79	12.5212	6816.88		5056.9	17.1686	1028.27	4.31667	1.1075	673.242	12.1719	261.758		23.5	126.062	82.1613			2.31818		18.1818	21.2121	6.06061	3.0303
SD	7.35324	11							3.0303		0.0380436	4.71425	26.7697	3.8618	80.4234	20.5188	0.186326	121.311	0.210752	682.534	1.64976	3473.44		2360.42	9.99714	405.358	0.586672	0.214562	203.061	8.27024	139.892		6.55875	10.9395	11.5155			0.838727
					Analysis performed
sample_ID	Age	Gender	group_ID	CyTOF	Bulk-RNA	Plasmatic cytokines	Flow cytometry	SEVERITY	TYPE OF Discharged	DAYS FROM ADMISISON TO START NIV OR INTUBATION	pH	pCO2 (mmHg)	pO2 (mmHg)	sO2 (%)	pO2/FiO2	ALT	TOTAL BILIRUBIN	CK	CREATININE	D-DIMER	Hb	WBC (N/uL)	Neutrophils (%)	Neutrophil (N/uL)	Lymphocytes (%)	Lymphocytes (N/uL)	RBC	INR	LDH	CRP	Platelets	FEVER T>37	RESP RATE	SYSTOLIC BLOOD PRESSURE	HEART RATE	COUGH	FATIGUE/MYALGIE	SOFA SCORE	COPD	DIABETES MELLITUS	CARDIOVASCULAR DISEASES	CHRONIC KIDNEY DISAESE	CANCER	OTHER DISEASES
C_002	88	M	COV	X		X		Severe	Deceased	NA	7.42	46.2	64.8	92.6	309	21	1.94	na	0.99	3240	13.6	5750	67	3860	19.7	1132.75	4.42	1.17	398	2	129	NO	18	120	94	YES	NO	na	NO	NO	YES	NO	NO	Hypertension; Alzheimer; cronic atrial fibrillation (not in OAT)
C_011	73	M	COV	X		X		Severe	Discharged	NA	7.49	31.5	65.2	94	109	33	0.55	321	0.91	2140	12.9	5470	77.7	4250.19	15	820.5	4.21	1.2	749	7	211	YES	20	120	71	YES	YES	2	NO	NO	NO	NO	NO	Hypertension; Cholecystectomy in 2016; Inguinal hernioplasty
C_016	77	M	COV	X				Severe	Deceased	0	7.46	36.6	62.9	93	90	50	0.52	na	1.92	1400	11.8	5610	87.1	4886.31	11	617.1	4.1	0.89	624	25	156	YES	32	190	140	YES	YES	5	NO	YES	YES	NO	NO	Hypertension, Unspecified surgery for gastric ulcer, Prostatectomy, Gallbladder Adenomyomatosis
C_024	70	M	COV			X		Severe	Deceased	3	7.47	36.5	69.3	94.4	115.5	56	1.09	160	1.2	3240	15	8330	79	6547	18	1499.4	4.82	1.09	1127	17.7	217	NO	33	120	80	YES	NO	6	NO	NO	NO	NO	NO	Hypertension
C_025	74	M	COV			X		Severe	Discharged	1	7.3	51	76.8	94.7	190	24	0.34	243	1.08	470	12	7080	90.8	6428.64	4.7	332.76	3.98	1.46	604	16.9	119	NO	14	128	68	YES	NO	3	NO	NO	NO	NO	NO	Obese, Hypertension, Atrial fibrillation in OAT, Obstructive Sleep Apnea
C_026	82	F	COV					Severe	Discharged	4	7.51	36.2	58.6	92.4	96	28	<0,3	119	1.77	1240	11.2	8640	89.4	7724.16	9	777.6	4.65	1.04	762	16	160	YES	35	125	87	YES	YES	5	NO	NO	NO	NO	NO	Hypertension
C_027	73	M	COV	X		X		Severe	Deceased	5	7.36	26.7	65.2	92	238	22	0.3	505	6.66	3300	11.2	3860	64	2455	31	1196.6	3.8	1.2	686	22	106	YES	24	122	70	YES	NO	na	NO	YES	NO	YES	NO	Chronic Renal Failure in stage IV from vasculitis; Hypertension
C_029	74	M	COV	X		X		Severe	Discharged	2	7.48	40.1	65.8	94.6	59	31	0.45	142	0.86	1150	12.4	6280	84	5300	13	816.4	4.01	1.08	680	14	177	YES	20	197	148	YES	YES	2	NO	NO	NO	NO	NO	Hypertension, Hyperuricemia
C_030	76	M	COV	X		X		Severe	Deceased	0	7.44	38.9	62.3	92.8	104	40	1.46	305	0.75	1110	13.9	7150	79	5613	18	1287	4.25	1	846	22	213	YES	40	135	94	YES	YES	4	NO	NO	NO	NO	NO	Hypertension and Hypercholesterolemia in treatment
C_032	78	M	COV			X		Severe	Discharged	NA	7.45	35.7	63.2	93.3	63	20	1.11	166	1.52	1170	11.3	5610	76.9	4314.09	15	841.5	4.71	1.09	588	5	135	YES	28	90	55	NO	YES	5	NO	NO	YES	NO	NO	Hypertension
C_034	80	M	COV	X		X		Severe	Deceased	0	7.47	31.5	53.2	89.2	53	83	1.9	238	0.66	2280	15.2	8210	77.5	6362.75	12	985.2	4.31	1.03	923	22	298	YES	30	160	92	NO	NO	5	NO	NO	YES	NO	NO	cronic atrial fibrillation ( in OAT)
C_039	72	M	COV			X		Severe	Deceased	0	7.47	39.9	60.4	93.3	150	188*	0.72	34	1.45	1260	11.3	25380*	95.2	na	2	507.6	4.42	1.05	503	5	132	YES	30	135	61	NO	NO	6	NO	NO	NO	NO	NO	na
C_041	78	F	COV	X		X		Severe	Deceased	1	7.34	31	65.6	93.7	82	41	0.4	10	0.77	990	12.7	4160	81.2	3377.92	13.1	544.96	4.6	1.09	804	na	184	NO	25	na	60	na	na	6	NO	NO	YES	NO	NO	Hypertension, Carrier of pace-maker and aortic prosthesis
C_049	79	M	COV			X	X	Severe	Deceased	1	7.48	33.8	65.6	93.5	82	27	0.53	99	2.29	3490	14.4	7320	77.6	5680.32	na	na	4.65	1.19	937	27.8	169	YES	25	120	na	YES	NO	na	NO	NO	NO	NO	NO	Hypertension in treatment
C_050	79	M	COV			X	X	Severe	Discharged	NA	na	38.4	59.9	89.9	99	41	0.79	1455*	1.23	3590	11.2	11020	87.8	9675.56	na	na	3.54	1.27	1599*	13.3	214	YES	20	120	84	YES	YES	5	NO	NO	NO	NO	NO	Previous retinal ischemia in hyperhomocysteninemia; Hyperuricemia; Glucose intolerance
C_063	85	M	COV			X	X	Severe	Transfered	NA	7.49	29.6	56.7	91.7	129	35	0.53	98	5.81	2530	10.3	7010	86.4	6056.64	na	na	3.43	1.57	649	7.1	224	YES	16	100	60	YES	NO	2	NO	NO	NO	NO	NO	Pulmonary Embolism; Left lower limb femoral-popliteal DVT treated with Rivaroxaban (2017); Previous excision with undamaged margins of basal cell carcinoma of the left eye canthus (2019); Hypoacusis; BPH
C_068	83	M	COV			X	X	Severe	Discharged	NA	7.5	31.8	43.7	82.8	208	24	0.63	150	0.89	na	11	10080	88.8	8951.04	na	na	3.49	1.13	595	4.6	379	NO	30	140	60	na	na	2	NO	NO	YES	NO	NO	Hypertension; Dyslipidemia;Obesity
C_082	77	M	COV			X	X	Severe	Deceased	4	7.47	24.9	83.3	96.6	183	94	1.25	417	1.17	2370	16.2	8100	na	na	na	na	4.76	1.2	1007	14.6	205	NO	36	120	100	na	na	4	YES	YES	YES	YES	NO	Hypertension
C_094	75	F	COV			X	X	Severe	Deceased	0	7.5	34.1	58.6	91.5	97.6	55	0.85	na	0.86	1450	12.1	3880	89.7	3480.36	7.47	289.836	4.02	1.04	991	18	240	NO	30	na	na	na	na	4	na	na	na	na	na	Hypertension; Dyslipidemia
C_112	71	M	COV			X		Severe	Discharged	2	7.46	41.1	52.8	89.6	53	58	0.91	2817*	1.12	810	14.6	6840	74.2	5075.28	16.37	1119.71	na	na	609	4	167	YES	22	180	84	na	na	na	NO	NO	NO	NO	NO	na
C_118	71	M	COV					Severe	Discharged	NA	7.5	30.2	51.6	90	246	22	0.89	154	1.13	1160	12.3	4700	64.2	3020	32.2	1513.4	3.89	1.03	601	15.2	196	YES	22	110	69	na	na	2	NO	NO	NO	NO	NO	na
C_122	76	M	COV	X				Severe	Deceased	3	7.48	37.2	58.3	92.1	194	21	0.82	125	1.56	1480	12.8	6100	81.1	4947.1	na	na	4.04	1.79	524	17	80	YES	28	145	70	na	na	5	NO	YES	YES	YES	NO	na
C_124	81	M	COV	X		X		Severe	Deceased	NA	7.42	43.9	48	83.6	160	10	0.34	61	0.58	1450	9.8	2670	62.5	1668.75	27.34	729.978	4.65	1.25	526	12.6	197	YES	36	120	68	na	na	2	YES	YES	YES	NO	YES	Localized cancer
C_171	73	M	COV			X		Severe	Deceased	20	na	na	na	na	263	8	0.51	20	1.52	na	8.6	5050	73	3686.5	19	959.5	3.29	1.91	304	10	158	YES	22	166	71	na	na	na	YES	NO	YES	YES	NO	na
C_174	83	M	COV			X		Severe	Transfered	1	na	na	na	na	na	9	0.47	21	4.05	na	9.3	24950*	90.4	na	5.1	1272	3.07	na	556	5.9	676	NO	na	107	110	na	na	na	NO	YES	YES	YES	NO	na
C_175	73	M	COV			X		Severe	Discharged	NA	7.39	29.8	88.4	96.5	421	16	0.3	47	2.39	630	10.8	4040	70.4	2844.16	20.54	829.816	3.08	0.94	444	6.8	159	YES	24	180	90	na	na	4	NO	YES	YES	YES	NO	na
C_190	81	M	COV			X		Severe	Deceased	NA	na	na	na	na	na	317*	0.79	na	1.58	320	15.5	4710	80	3760	14.2	533.92	4.09	0.99	812	6.2	236	NO	22	150	82	na	na	na	NO	NO	YES	YES	NO	Hypertension
C_239	78	M	COV					Severe	Discharged	NA	7.43	37	70.8	94.5	116	25	0.77	149	2.03	690	na	na	na	na	na	na	5.03	3.34	958	4.3	94	YES	20	130	85	na	na	5	NO	YES	YES	YES	NO	Hypertension; Arthrosis
C_245	71	M	COV		X			Severe	Discharged	NA	na	na	na	na	154	15	0.46	77	1.06	240	14.4	6640	72.1	4787.44	24	1148.99	na	na	428	0	176	NO	18	130	60	na	na	na	NO	NO	NO	NO	NO	na
C_450	69	M	COV		X			Severe	Discharged	NA	7.49	30.1	49.8	87.5	237	66	0.84	452	0.71	660	15	10080	89.3	3760	na	na	4.77	0.93	569	3	204	YES	27	145	82	na	na	2	NO	YES	NO	NO	NO	Hypercholesterolemia
C_453	80	M	COV		X			Severe	Deceased	0	7.46	35	53	90	106	23	0.68	51	0.91	1300	13.9	5430	71	3760	na	na	4.75	0.99	515	5.4	172	YES	20	180	90	na	na	4	NO	YES	YES	NO	NO	na
Mean	76.4	28	M						16		7.45115	35.5074	61.9926	91.8444	151.969	34.4138	0.771333	166.56	1.684	1612.86	12.5567	6422.14		4898.97		898.023	4.16655	1.24857	677.3	11.68	199.452		25.5667	137.414	82.2414			3.91304		32.2581	48.3871	25.8065	3.22581
SD	4.3359	3	F						51.6129		0.0525606	5.91744	10.1418	3.30097	86.2537	21.3751	0.422625	138.279	1.42202	1012.48	1.95689	2057.24		1888.97		347.816	0.548819	0.476505	202.463	7.58317	106.242		6.5794	27.6541	22.027			1.47442
